# Supplementary material for: InundatEd: A Large-scale Flood Risk Modeling System on a Big-data – Discrete Global Grid System Framework
Source: Copernicus journal article supplement (doi:10.5194/gmd-2020-316), 2020-10-28

**Supplementary Materials for “InundatEd: A Large-scale Flood Risk Modeling System on a Big-data - Discrete Global Grid System Framework”**

Chiranjib Chaudhuri<sup>1</sup>, Annie Gray<sup>1</sup>, and Colin Robertson<sup>1</sup>

<sup>1</sup>Wilfrid Laurier University, Department of Geography and Environmental Studies,  
Waterloo, Canada

Email: [chiranjibchaudhuri@gmail.com](mailto:chiranjibchaudhuri@gmail.com)

## Supplementary Tables

Table S1: Hurricane Hazel Regulatory Flood vs. 100-year Return Period – Grand River Watershed

| <b>Hydrometric Station</b> | <b>Upstream Area (km<sup>2</sup>)</b> | <b>Regulatory Flood Discharge (m<sup>3</sup>s<sup>-1</sup>)</b> | <b>100-Year Return Period Discharge (m<sup>3</sup>s<sup>-1</sup>)</b> |
|----------------------------|---------------------------------------|-----------------------------------------------------------------|-----------------------------------------------------------------------|
| 02GA003                    | 2966.437                              | 1140                                                            | 1115.128                                                              |
| 02GA010                    | 857.8116                              | 328                                                             | 355.2413                                                              |
| 02GA013                    | 689.3451                              | 592                                                             | 751.7521                                                              |
| 02GA015                    | 477.7452                              | 130                                                             | 153.3091                                                              |
| 02GA016                    | 665.6931                              | 168                                                             | 286.5565                                                              |
| 02GA017                    | 278.3187                              | 137                                                             | 177.1731                                                              |
| 02GA018                    | 452.3958                              | 232                                                             | 381.725                                                               |
| 02GA022                    | 399.4326                              | 235                                                             | 300.6779                                                              |
| 02GA033                    | 54.4572                               | 21.2                                                            | 30.58763                                                              |
| 02GB001                    | 4372.953                              | 1100                                                            | 1495.431                                                              |
| 02GB006                    | 137.5461                              | 50.4                                                            | 67.71159                                                              |

Table S2: Excluded Observed Flood Extent Polygon Areas

| <b>Observed Flood Extent Polygon</b>                    | <b>Subcatchment Number</b> | <b>Intersection (% subcatchment area)</b> | <b>Excluded Observed Flood Extent Polygon Area (km<sup>2</sup>)</b> |
|---------------------------------------------------------|----------------------------|-------------------------------------------|---------------------------------------------------------------------|
| FloodExtentPolygon_QC_CentralOttawa_20190503_113004.shp | 5156                       | 0.039                                     | 0.00992                                                             |
| FloodExtentPolygon_QC_CentralOttawa_20190503_113004.shp | 4582                       | 0.127                                     | 0.03154                                                             |
| FloodExtentPolygon_QC_CentralOttawa_20190503_113004.shp | 12863                      | 4.047                                     | 0.06318                                                             |
| FloodExtentPolygon_QC_LowerOttawa_20190429_230713.shp   | 1755                       | 13.90                                     | 2.25351                                                             |
| FloodExtentPolygon_QC_LowerOttawa_20190429_230713.shp   | 10505                      | 24.055                                    | 14.852                                                              |
| FloodExtentPolygon_QC_LowerOttawa_20190507_111329.shp   | 1755                       | 18.599                                    | 3.01422                                                             |
| FloodExtentPolygon_QC_LowerOttawa_20190507_111329.shp   | 10505                      | 24.100                                    | 14.8803                                                             |
| FloodExtentPolygon_QC_LowerOttawa_20190513_225800.shp   | 12115                      | 14.262                                    | 3.18542                                                             |
| FloodExtentPolygon_QC_LowerOttawa_20190513_225800.shp   | 9504                       | 6.8904                                    | 1.6800                                                              |
| FloodExtentPolygon_QC_LowerOttawa_20190513_225800.shp   | 1755                       | 19.830                                    | 3.2136                                                              |
| FloodExtentPolygon_QC_LowerOttawa_20190513_225800.shp   | 10505                      | 23.722                                    | 14.6467                                                             |

## Supplementary Figures

Figure S1: GIS Inputs for the Grand River Watershed and Ottawa River Watershed: study area (a-b), land use/ land cover (c-d), and flow lines (e-f). The maps are created in Qgis with the basemaps provided by © Google Satellite Maps and © Google Street Maps under OpenLayerPlugin.

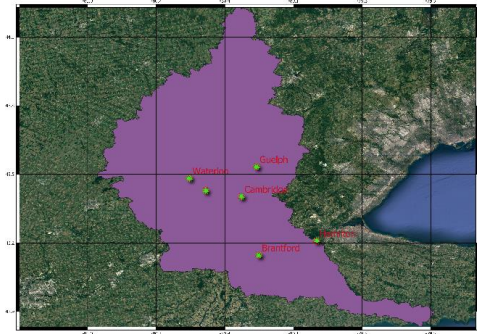

a) Grand River Watershed Study Area

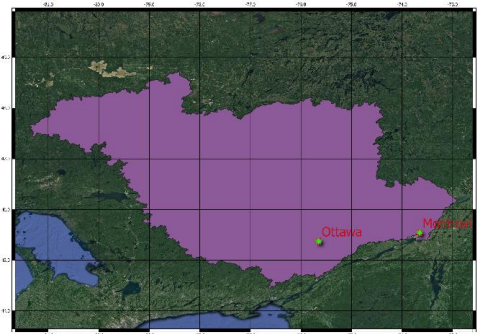

b) Ottawa River Watershed Study Area

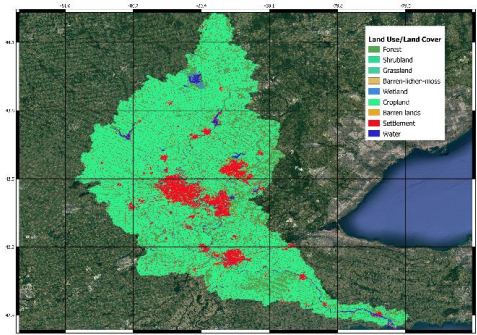

c) Grand River Watershed Land Use/Cover

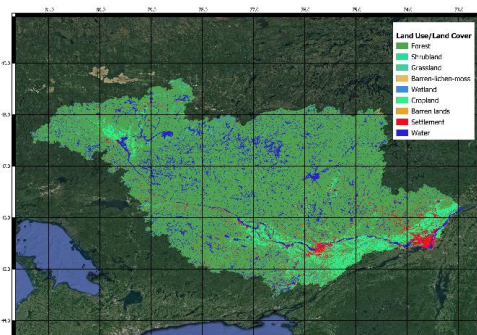

d) Ottawa River Watershed Land Use/Cover

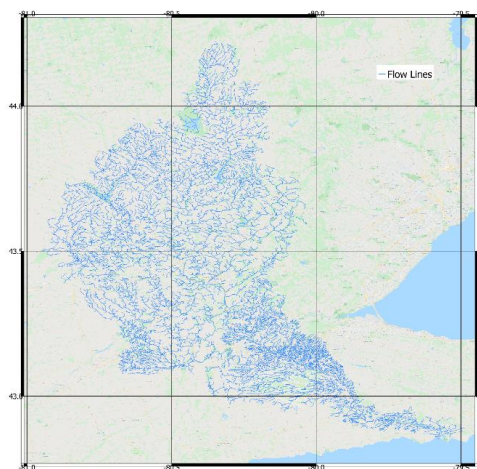

d) Grand River Watershed Flow Lines

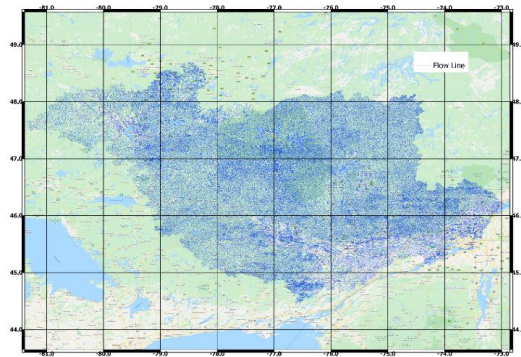

e) Ottawa River Watershed Flow Lines

Figure S2: DGGs conversion flowcharts for raster input data (a), polygon vector input data (b), and network (directional) input data (c). The maps are created in ArcGIS with the basemaps provided by © ESRI.

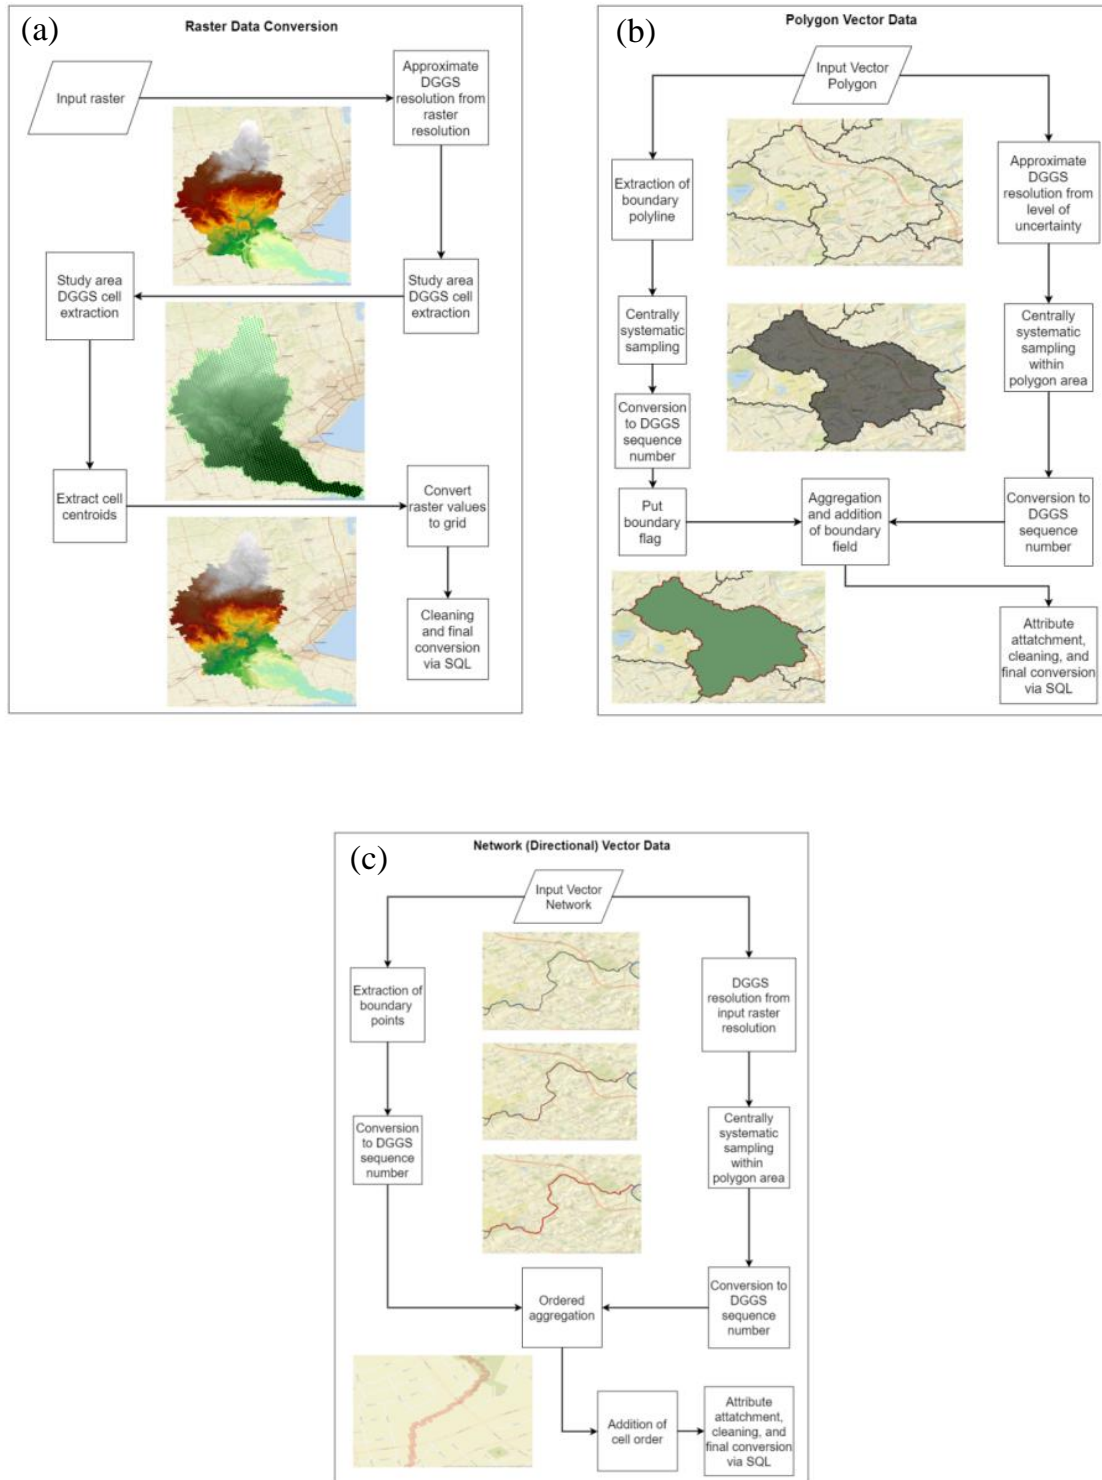

Figure S3: GEV Distribution Regional Growth Curves – Grand River Watershed and Ottawa River Watershed

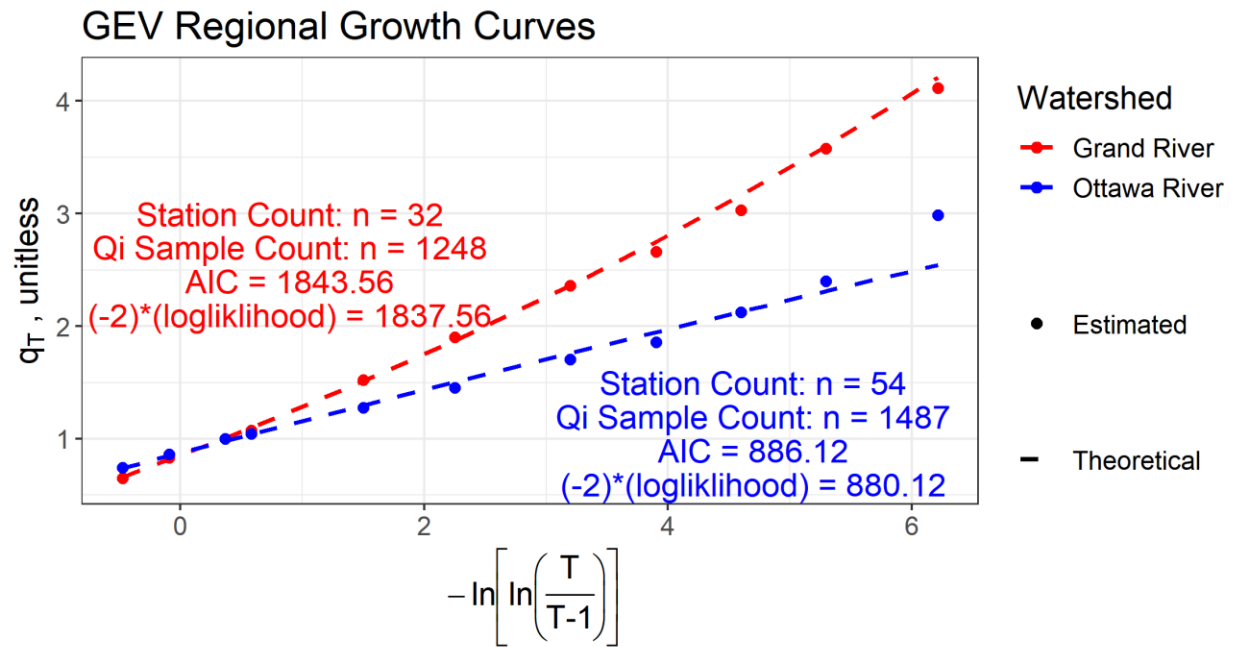

Figure S4: Additional Binary Classification Results – Ottawa River Watershed

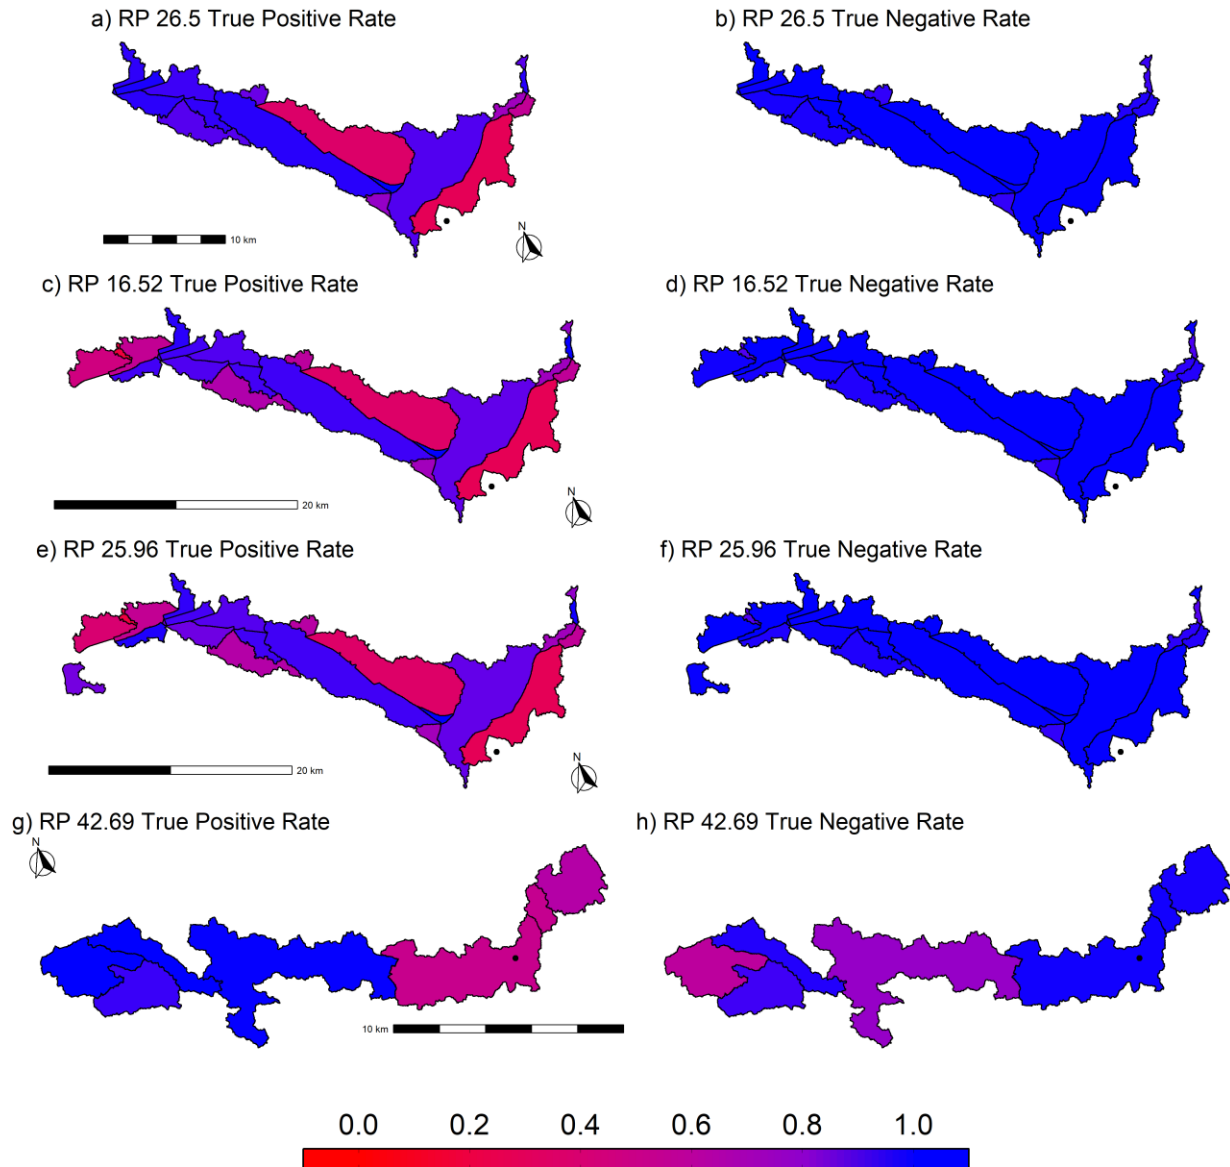

Figure S5: Grand River Watershed Dams

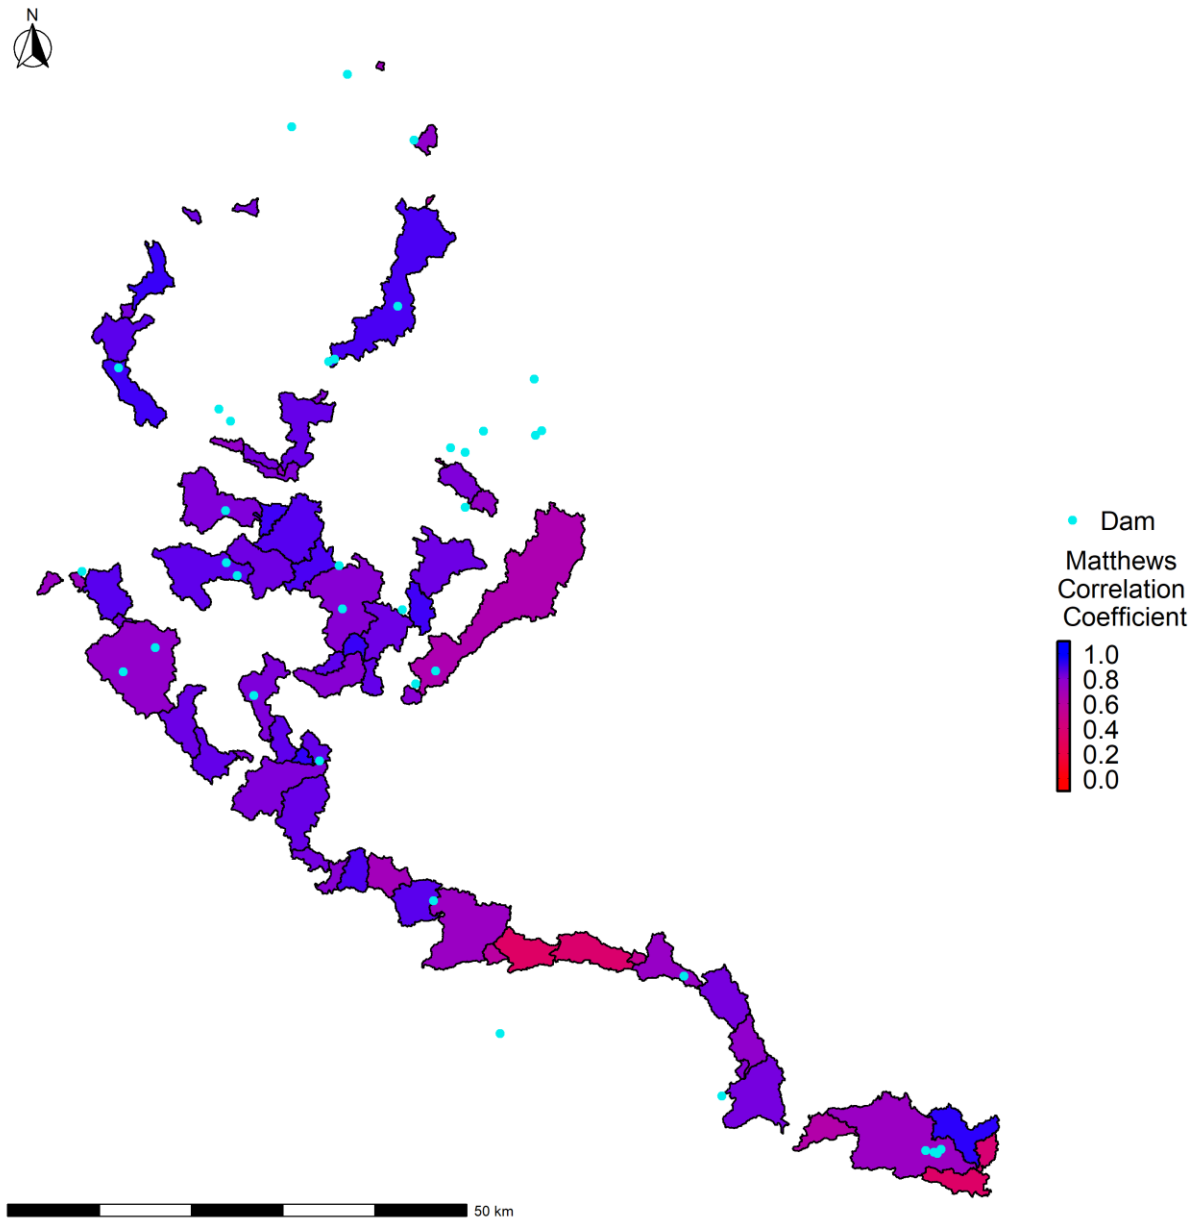



Figure S6: Model Run Times

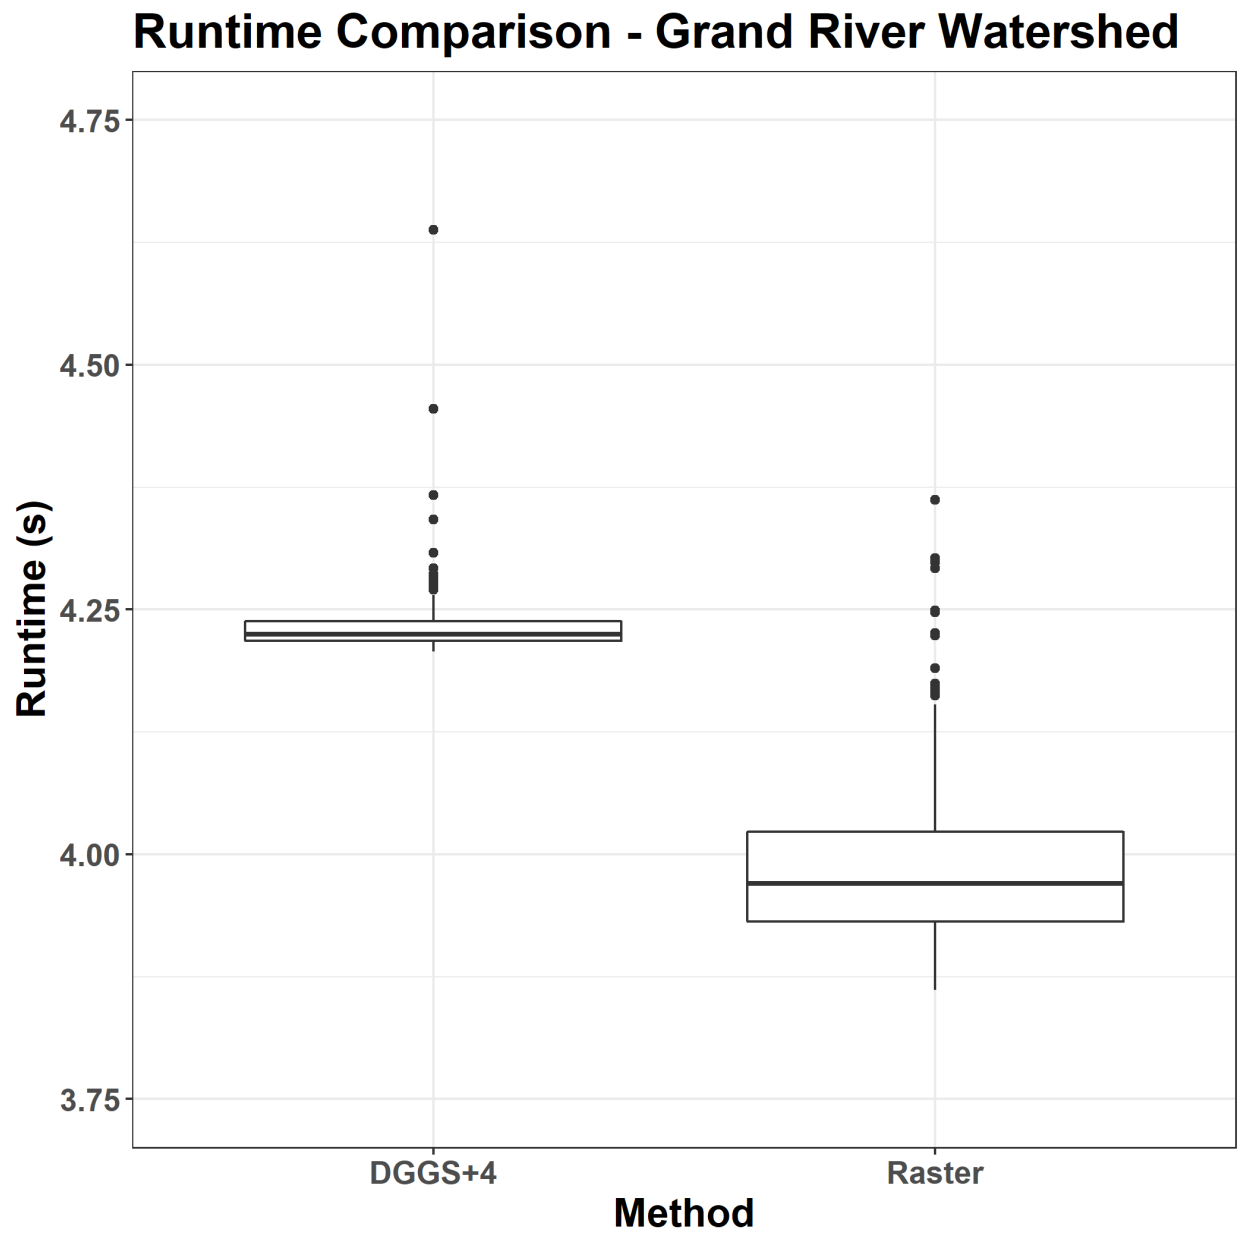

Supplement: Supplementary file 1 [file gmd-2020-316-supplement.pdf]
